# Supplementary material
Source: PubMed Central journal article supplement (PMC5696003)
Supplement: NIHMS905692-supplement-supplement_1.pdf [file NIHMS905692-supplement-supplement_1.pdf]

Supplementary Figure 1

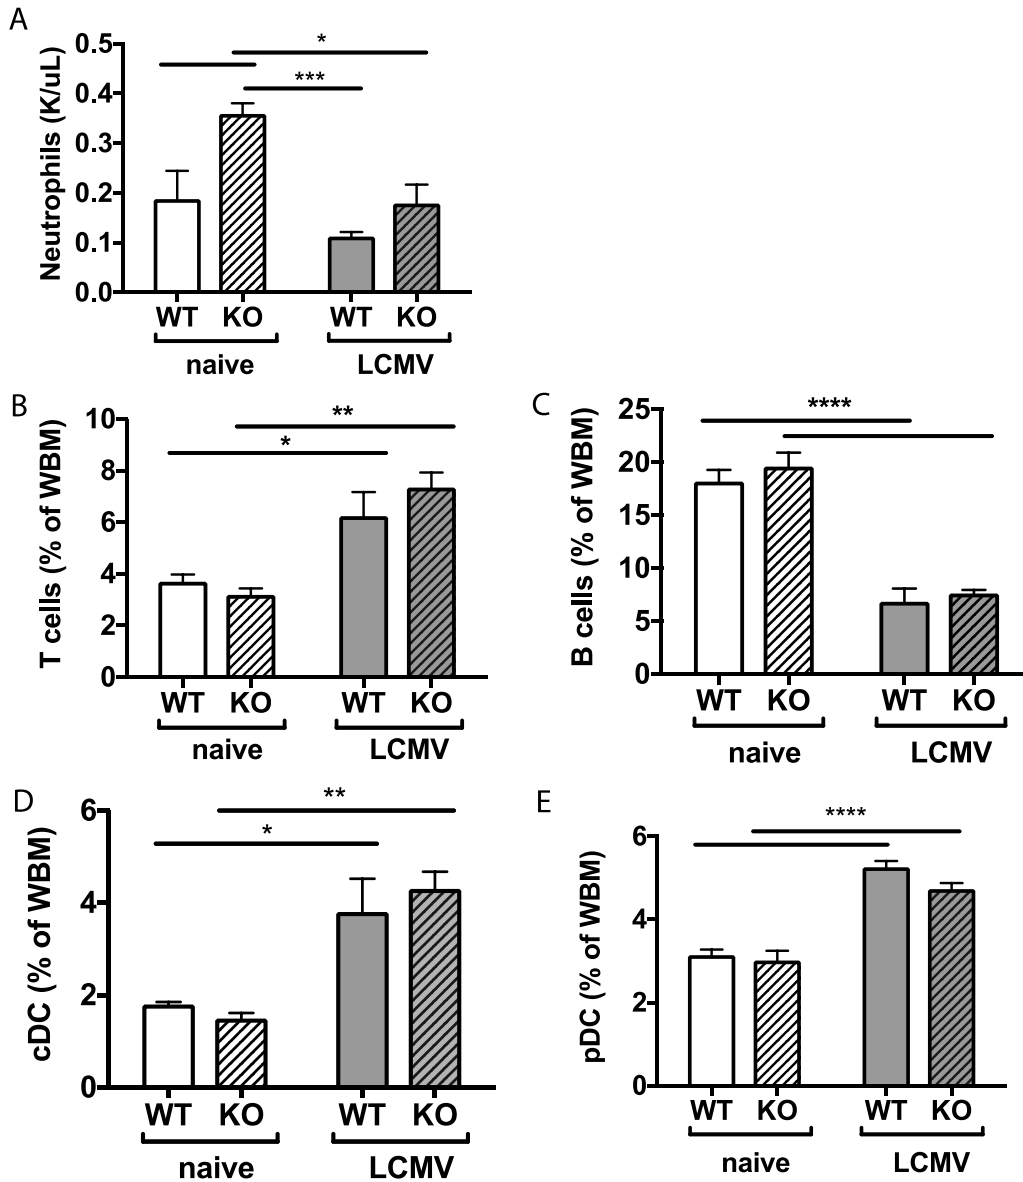

Supplementary Figure 1. MiR-22 KO mice show impaired plasmacytoid DC expansion in bone marrow during LCMV infection. Leukocyte populations in the bone marrow of WT or miR-22 KO mice were assessed by flow cytometry at baseline or at 6 days post LCMV infection. (A) Baseline number of neutrophils was higher in miR-22 KO mice and declined during infection. (B) T cells were increased upon infection. (C) B cells were diminished upon infection. (D) Conventional DCs were increased upon infection. (E) Plasmacytoid DCs were increased to a lesser degree in miR-22 KO mice upon infection. \*  $p < 0.05$ , \*\*  $p < 0.01$ , \*\*\*  $p < 0.001$ , \*\*\*\*  $p < 0.0001$ .  $n = 4-5$  per group. Results representative of at least 2 independent experiments.

Supplementary Figure 2.

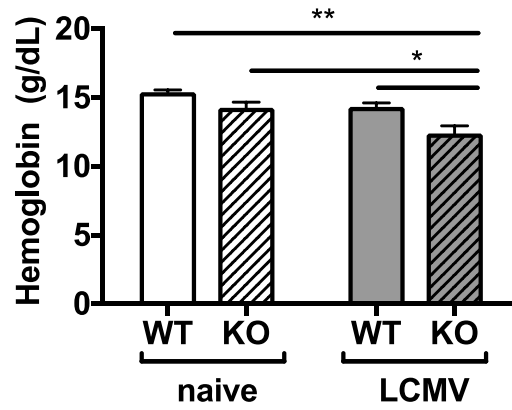

Supplementary Figure 2. Hemoglobin in WT versus miR-22 KO animals at baseline and at day 6 post-LCMV infection. \*  $p < 0.05$  \*\* $p < 0.01$   $n = 3-5$  per group. Data are representative of 3 independent experiments.

### Supplementary Figure 3

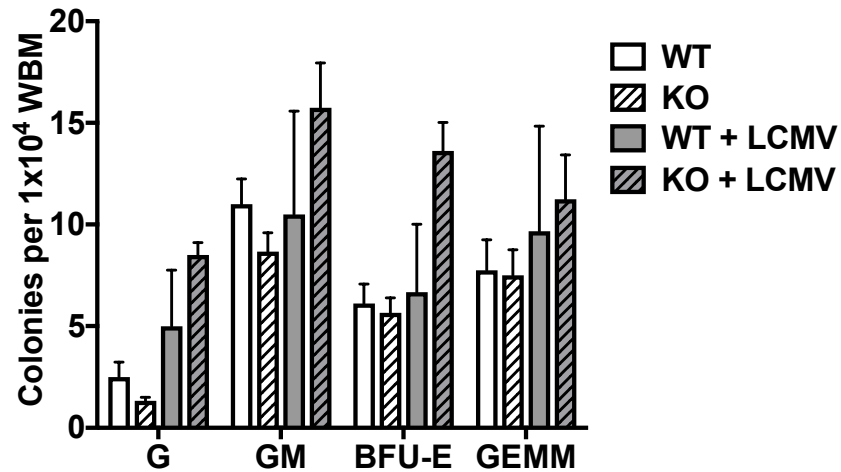

**Supplementary Figure 3.** WBM cells were isolated from WT or miR022 KO mice in the presence or absence of LCMV infection and cultured in methylcellulose for 14 days. Granulocyte (G), granulocyte-monocyte (GM), blast-forming erythroid (BFU-E) and granulocyte-eosinophil-monocyte-macrophage (GEMM) colonies were then counted and scored by morphologic appearance. No differences are statistically significant by 2-way ANOVA. Single experiment performed in triplicate.

Supplementary Figure 4.

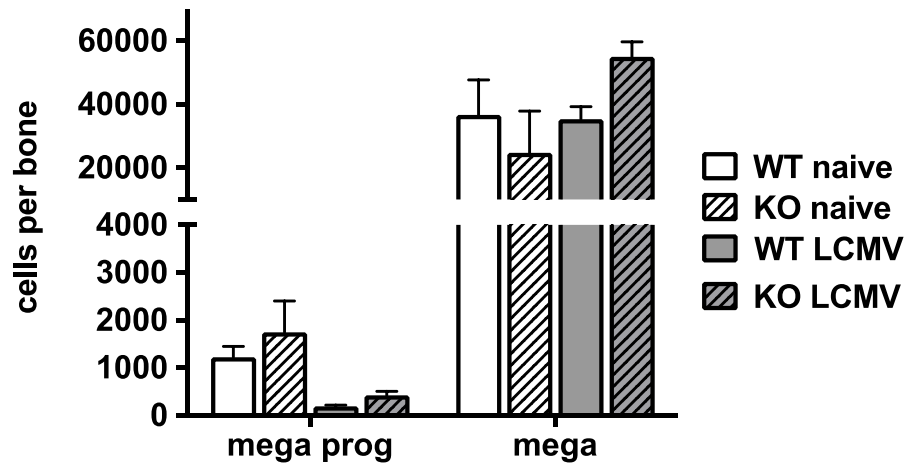

**Supplementary Figure 4.** The absolute number of megakaryocyte progenitors and megakaryocytes per bone in WT versus miR-22 KO animals at baseline and at day 6 post-LCMV infection. Differences within each group are not significant by 2 way ANOVA with Tukey's test of multiple comparisons. n=3-5 per group. Results are representative of 2 independent experiments.
